# Supplementary material for: Synthesis of the non-classical acetogenin mucocin: a modular approach based on olefinic coupling reactions
Source: Royal Society of Chemistry journal article supplement (doi:10.1039/b504937g), 2005-01-01

## **Synthesis of the Antitumor Agent Mucocin: A Modular Approach Based on Olefinic Coupling Reactions**

Lei Zhu and David R. Mootoo

*Department of Chemistry, Hunter College/CUNY, 695 Park Avenue, New York, NY 10021*

[dmootoo@hunter.cuny.edu](mailto:dmootoo@hunter.cuny.edu)

### **Supporting Information**

<sup>1</sup>H NMR and <sup>13</sup>C NMR spectra of compounds **8R**, **8S**, **2** and **2-di-O-acetate**

**General.** <sup>1</sup>H and <sup>13</sup>C NMR spectra were recorded at 500 and 125 MHz respectively, in CDCl<sub>3</sub> solutions, with CHCl<sub>3</sub> as internal standard.

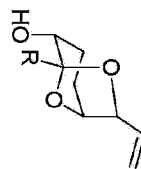

R = CH<sub>3</sub>(CH<sub>2</sub>)<sub>9</sub>

8R

500 MHz (CDCl<sub>3</sub>)

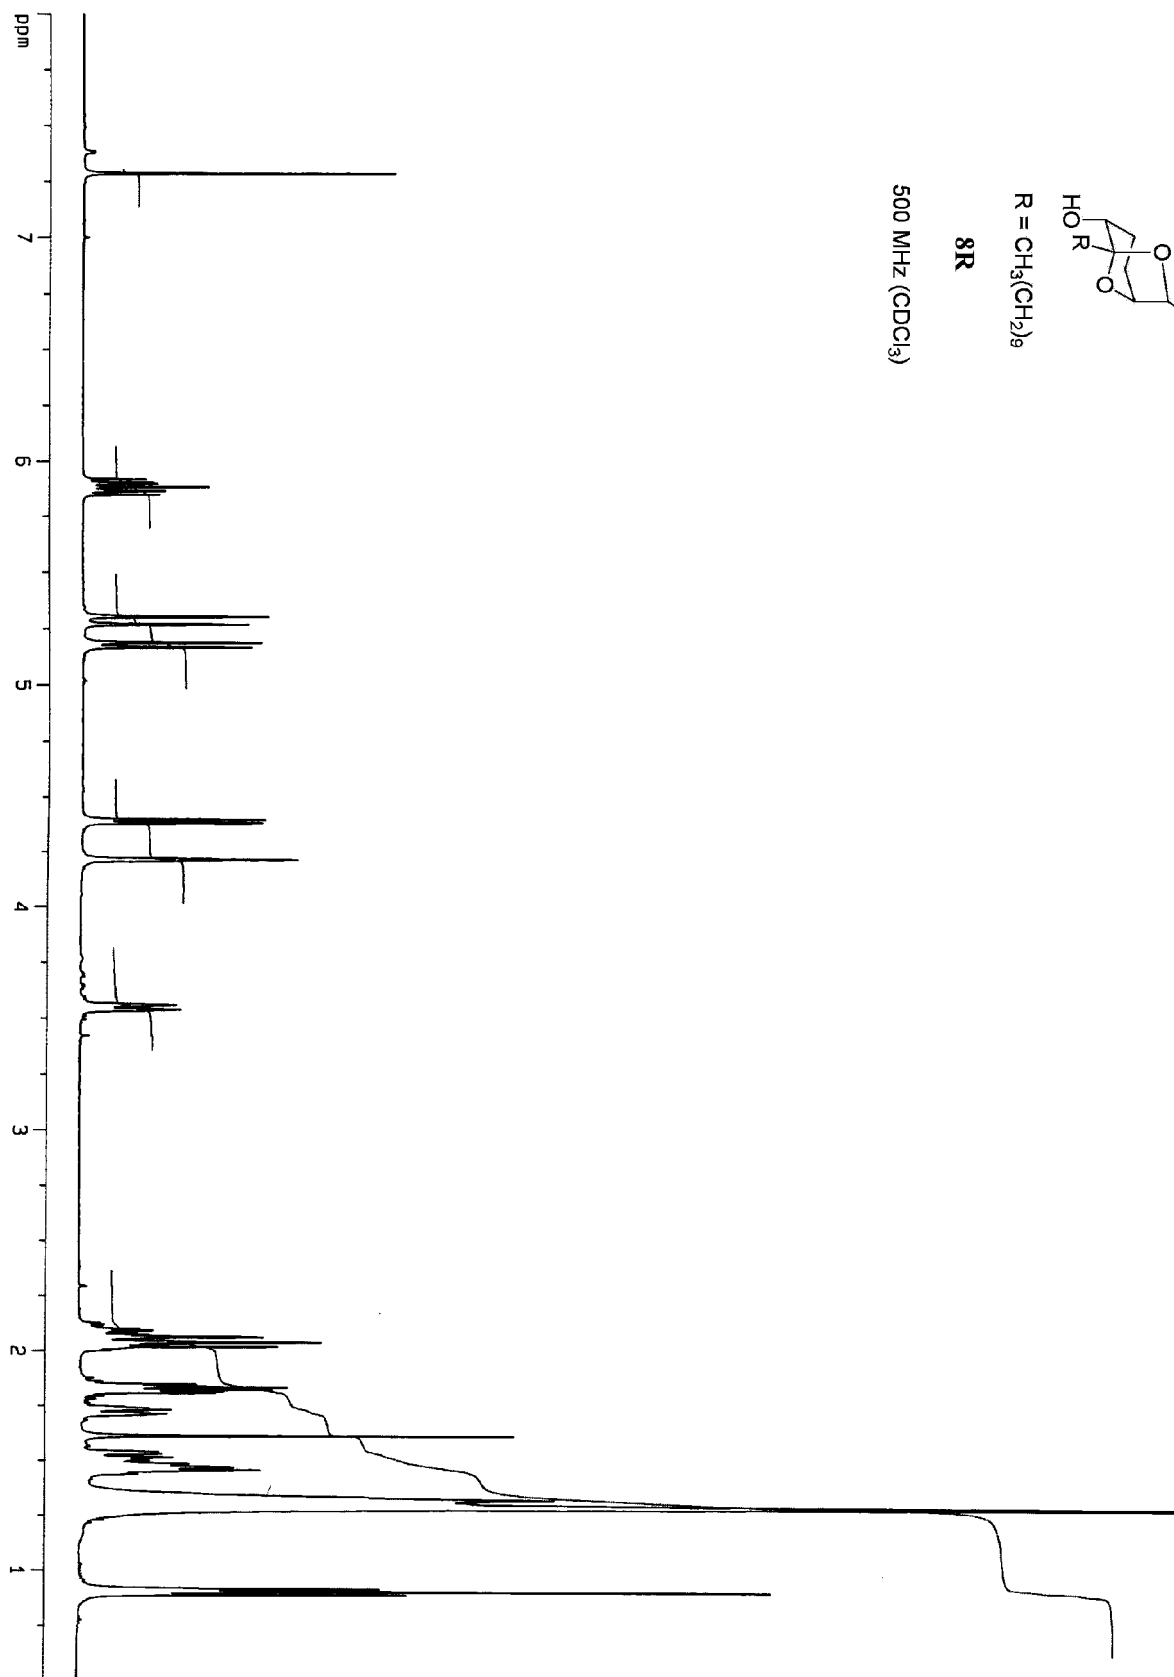

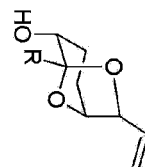

R = CH<sub>3</sub>(CH<sub>2</sub>)<sub>9</sub>

**8R**

125 MHz (CDCl<sub>3</sub>)

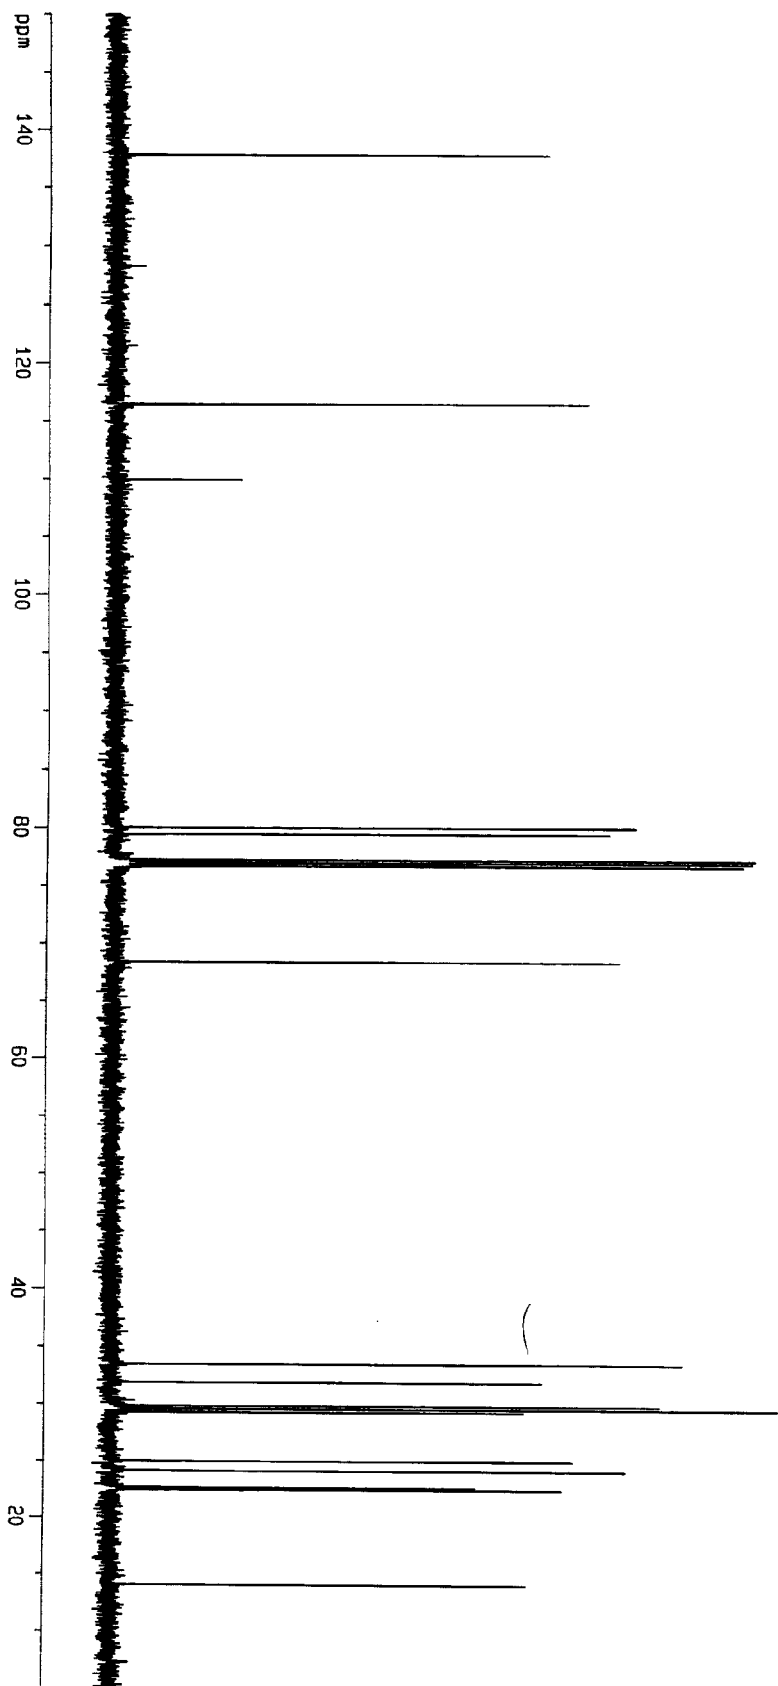

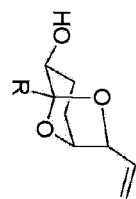

R = CH<sub>3</sub>(CH<sub>2</sub>)<sub>9</sub>

**8S**

500 MHz (CDCl<sub>3</sub>)

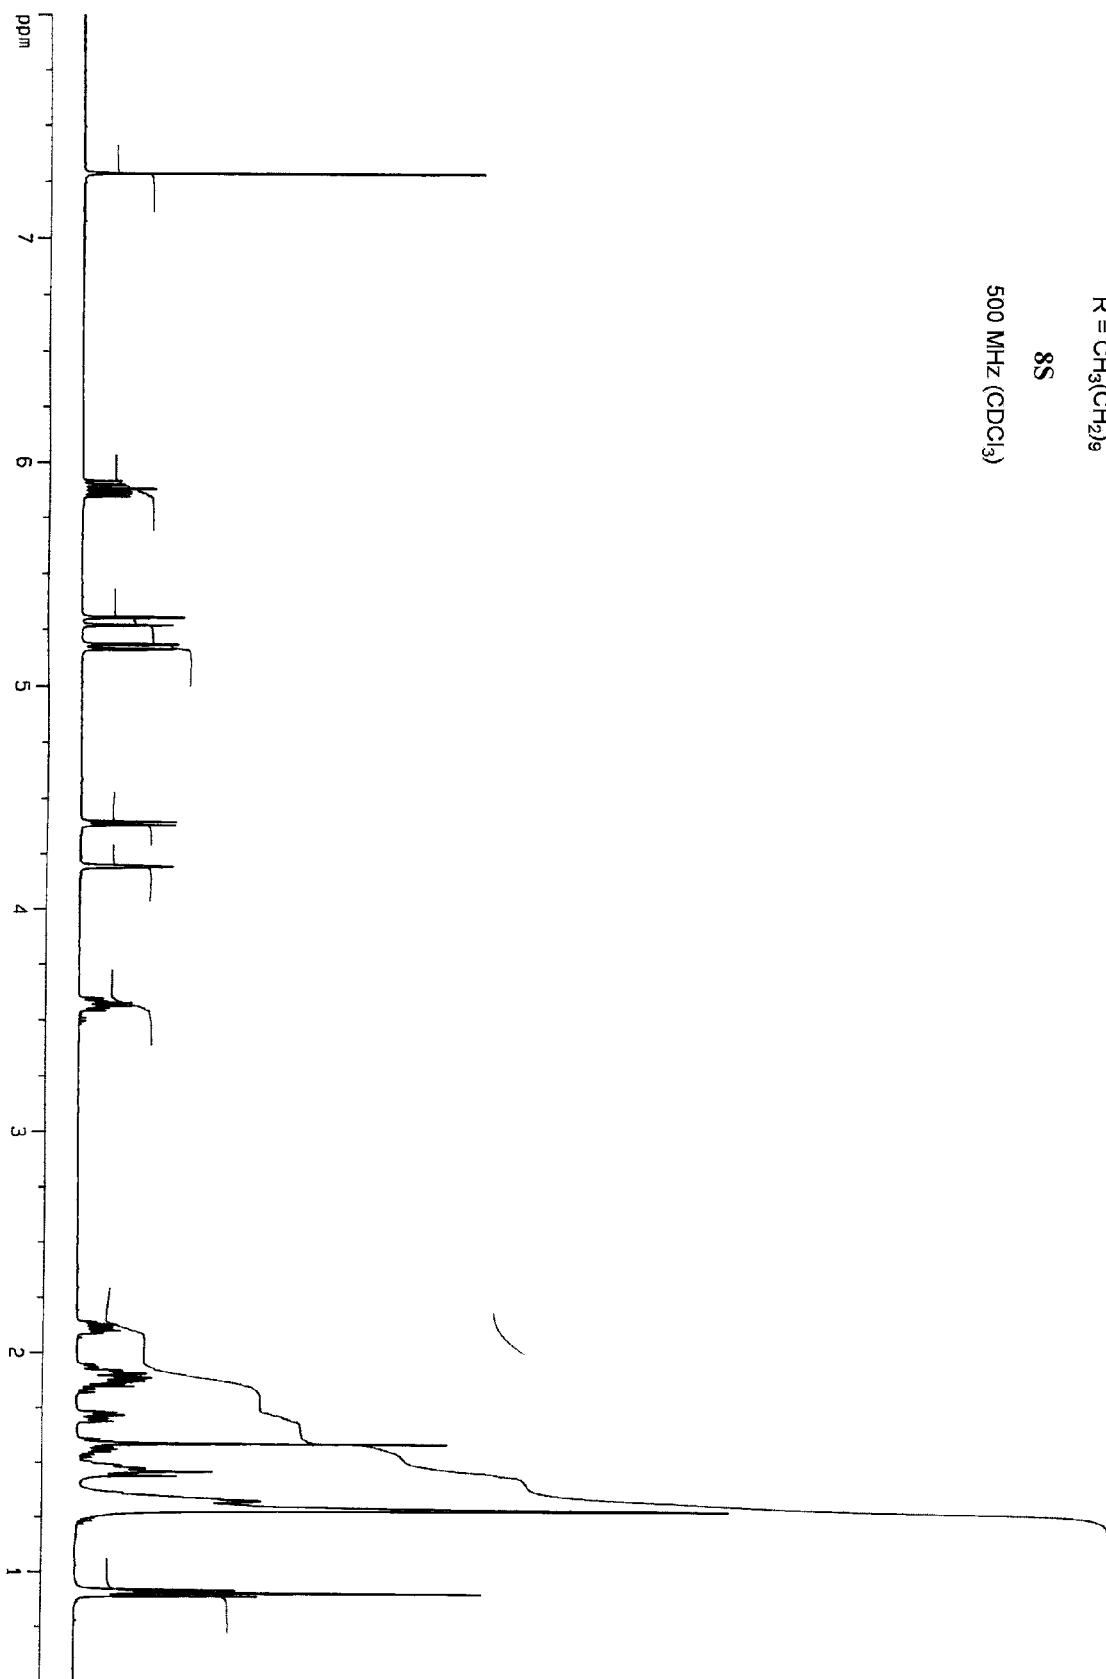

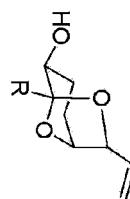

R = CH<sub>3</sub>(CH<sub>2</sub>)<sub>9</sub>

**8S**

125 MHz (CDCl<sub>3</sub>)

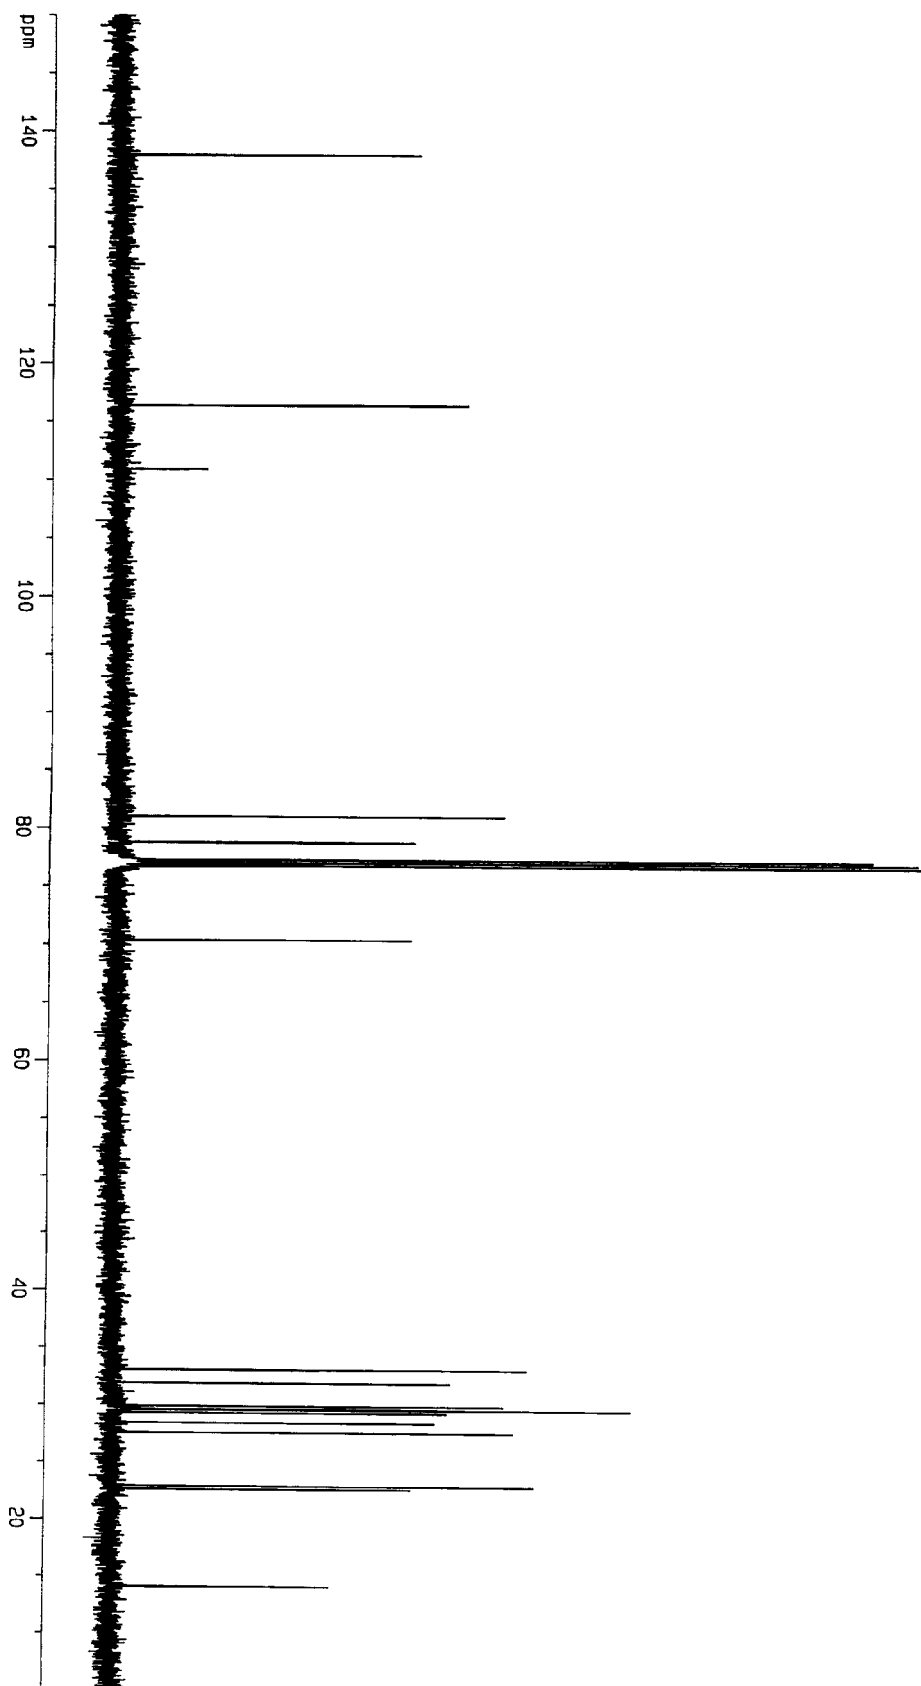

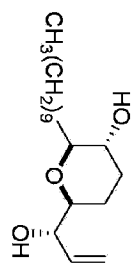

2

500 MHz (CDCl<sub>3</sub>)

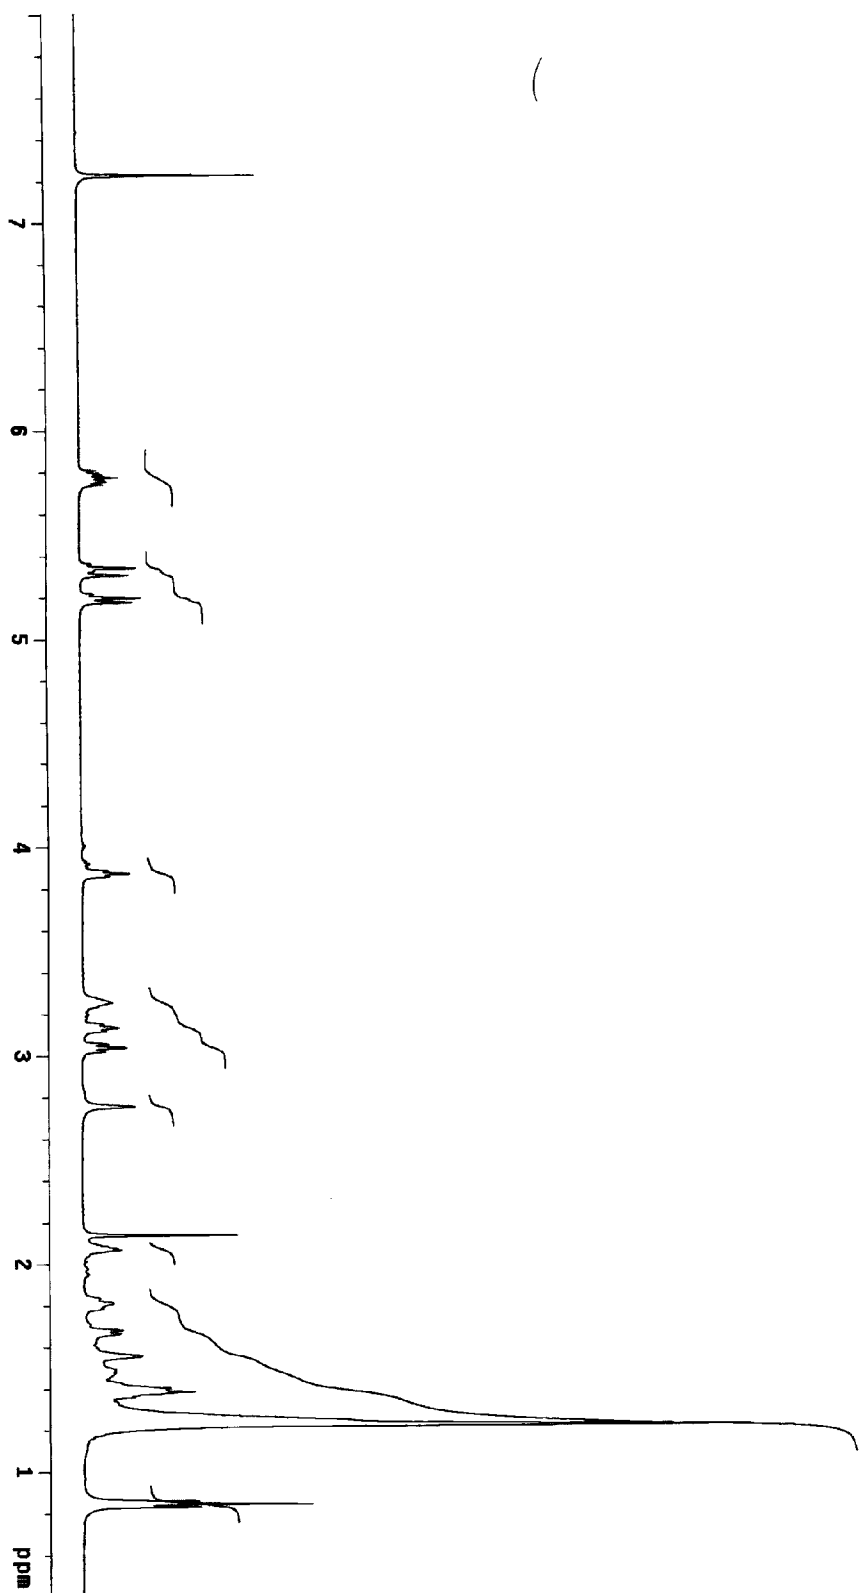

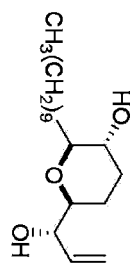

2

125 MHz (CDCl<sub>3</sub>)

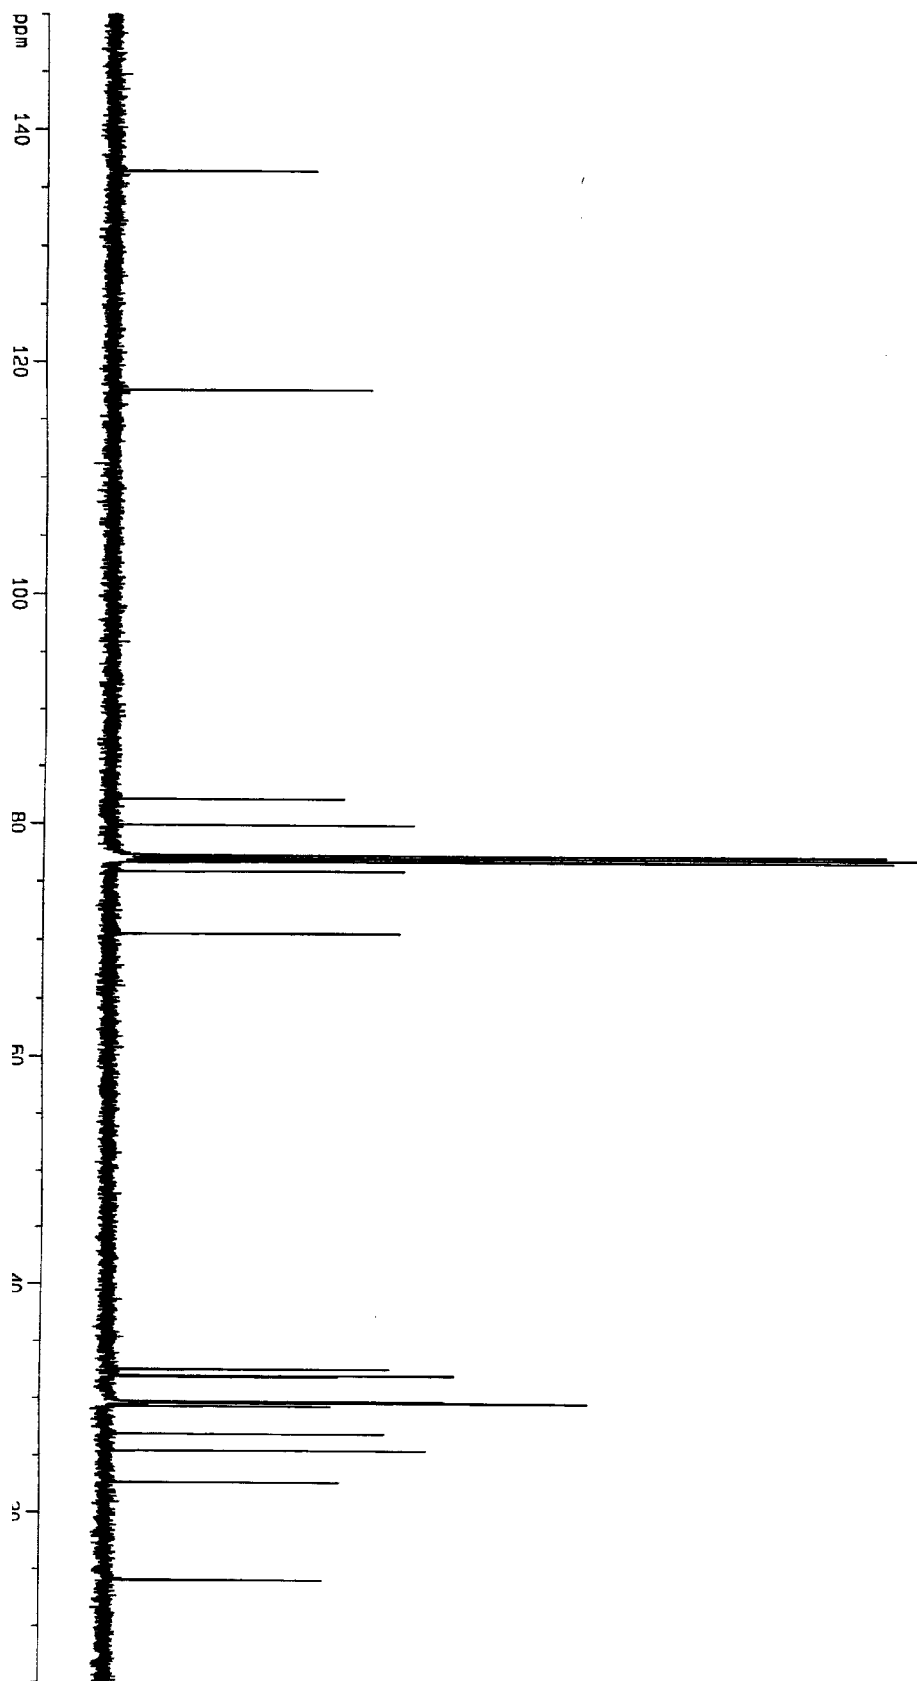

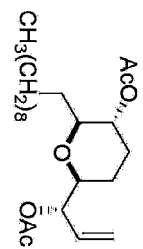

**2-di-O-acetate**  
500 MHz (CDCl<sub>3</sub>)

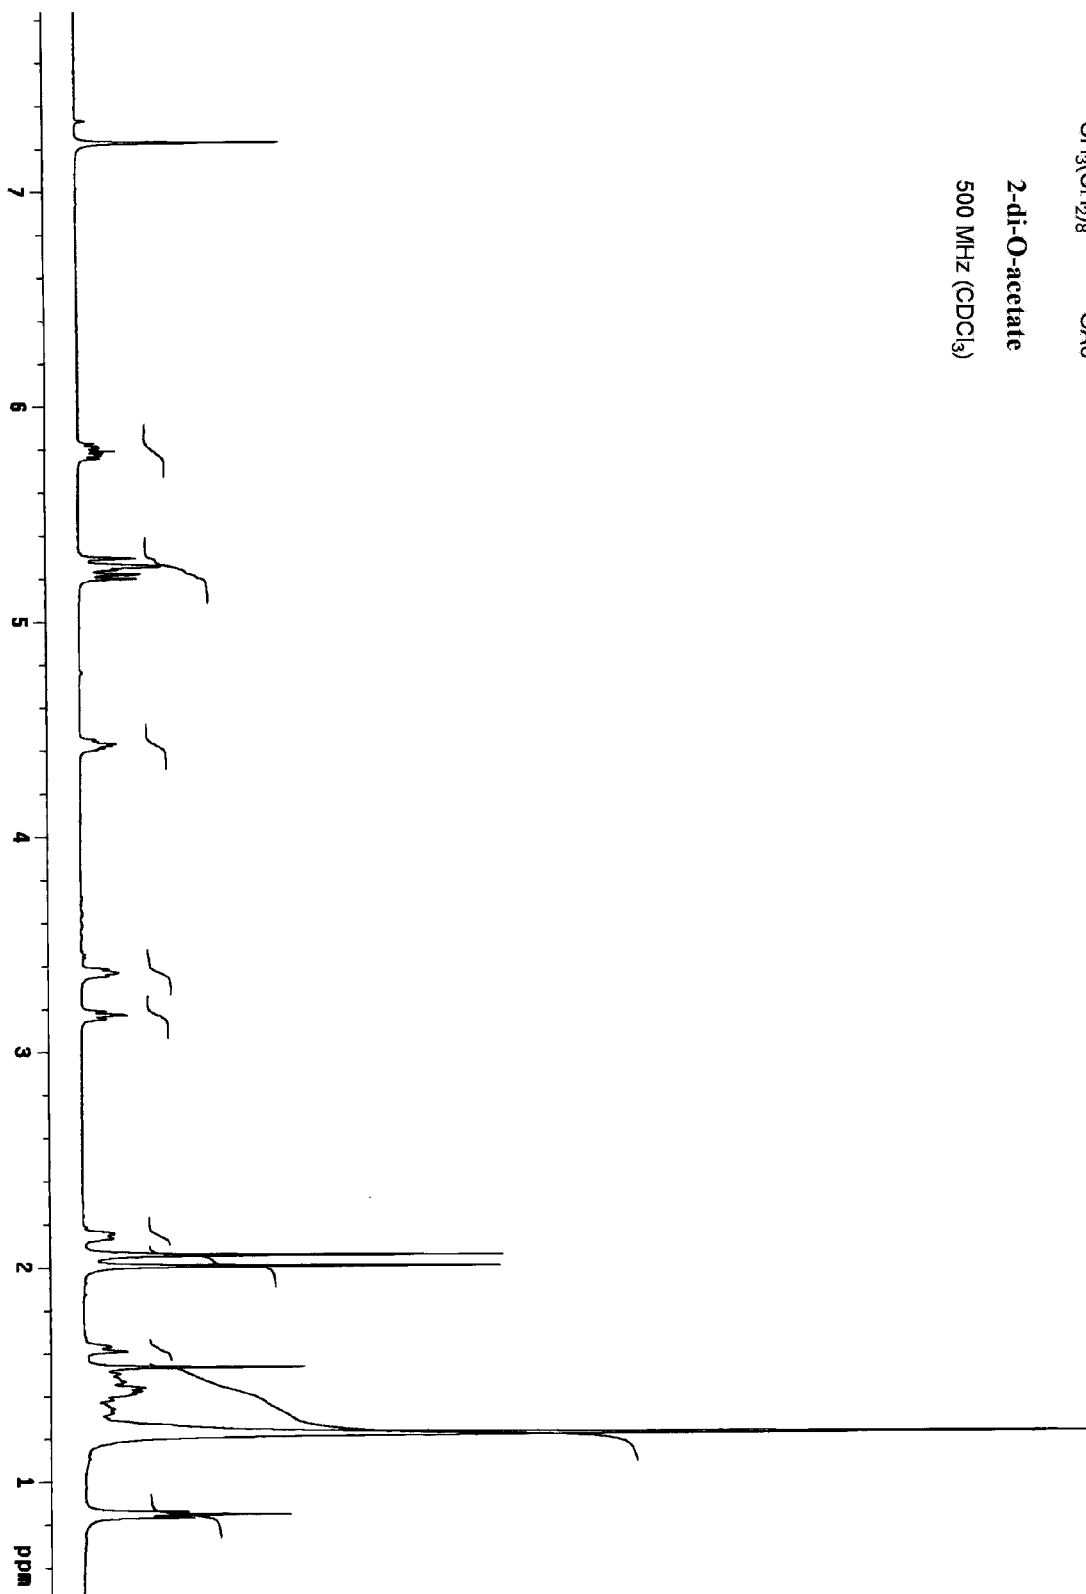

Supplement: b504937g(1).pdf [file b504937g%281%29.pdf]
