# Supplementary material for: Synthesis of the non-classical acetogenin mucocin: a modular approach based on olefinic coupling reactions
Source: Royal Society of Chemistry journal article supplement (doi:10.1039/b504937g), 2005-01-01

## Synthesis of the Antitumor Agent Mucocin: A Modular Approach Based on Olefinic Coupling Reactions

Lei Zhu and David R. Mootoo

*Department of Chemistry, Hunter College/CUNY, 695 Park Avenue, New York, NY 10021*

[dmootoo@hunter.cuny.edu](mailto:dmootoo@hunter.cuny.edu)

### Supporting Information

<sup>1</sup>H NMR and <sup>13</sup>C NMR spectra of compounds **11**, **14**, **15** and **16**

**General.** <sup>1</sup>H and <sup>13</sup>C NMR spectra were recorded at 500 and 125 MHz respectively, in CDCl<sub>3</sub> solutions, with CHCl<sub>3</sub> as internal standard.

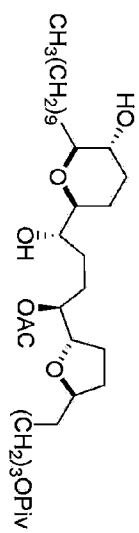

11

500 MHz (CDCl<sub>3</sub>)

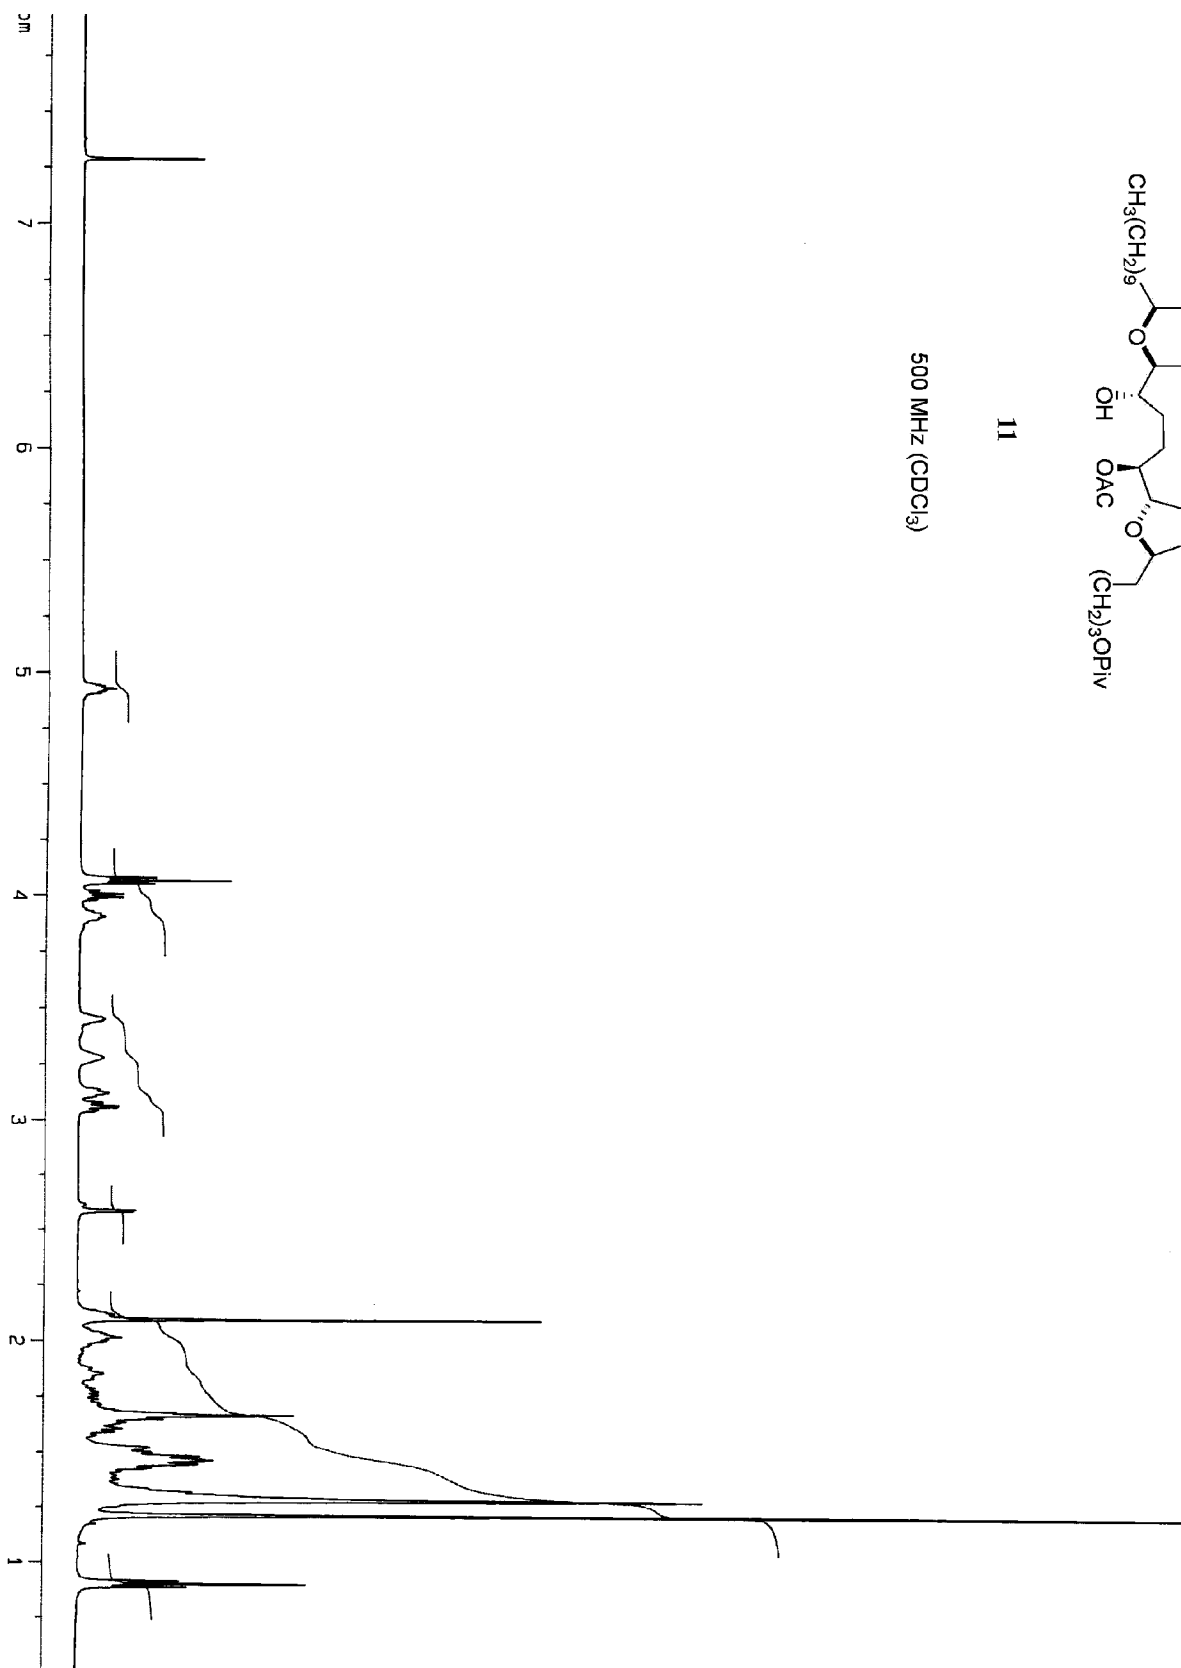

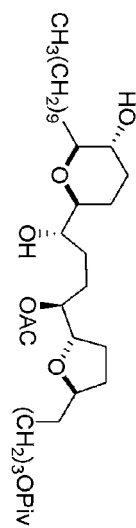

11

125 MHz (CDCl<sub>3</sub>)

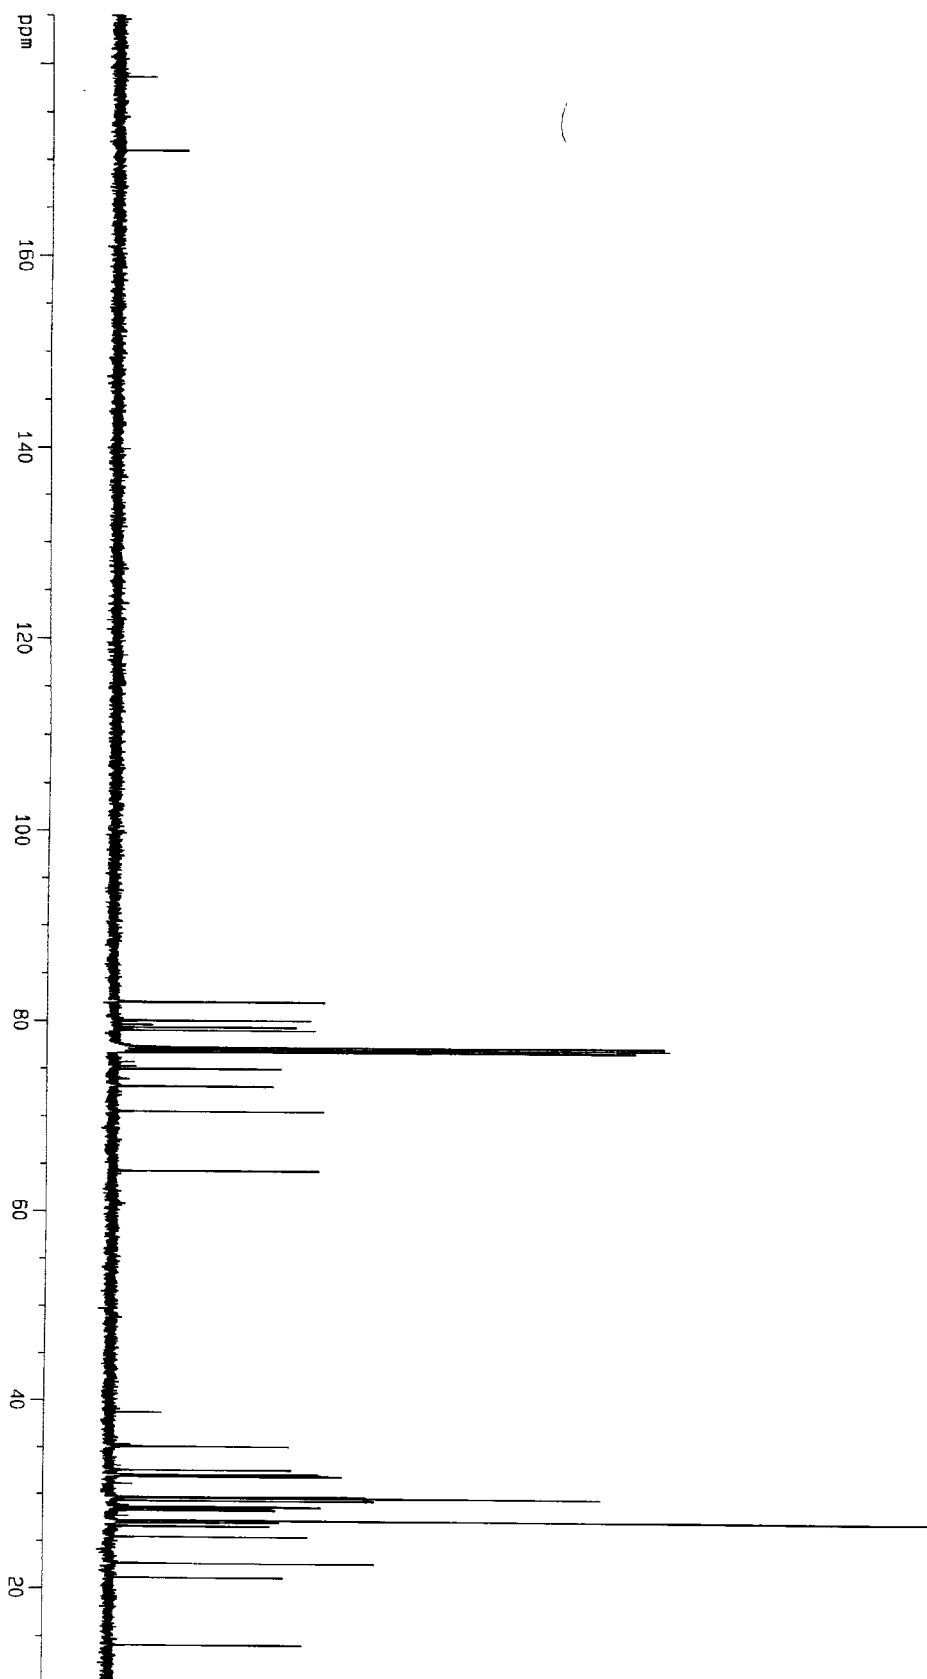

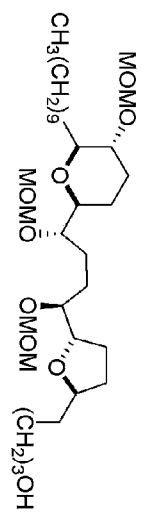

14

500 MHz ( $\text{CDCl}_3$ )

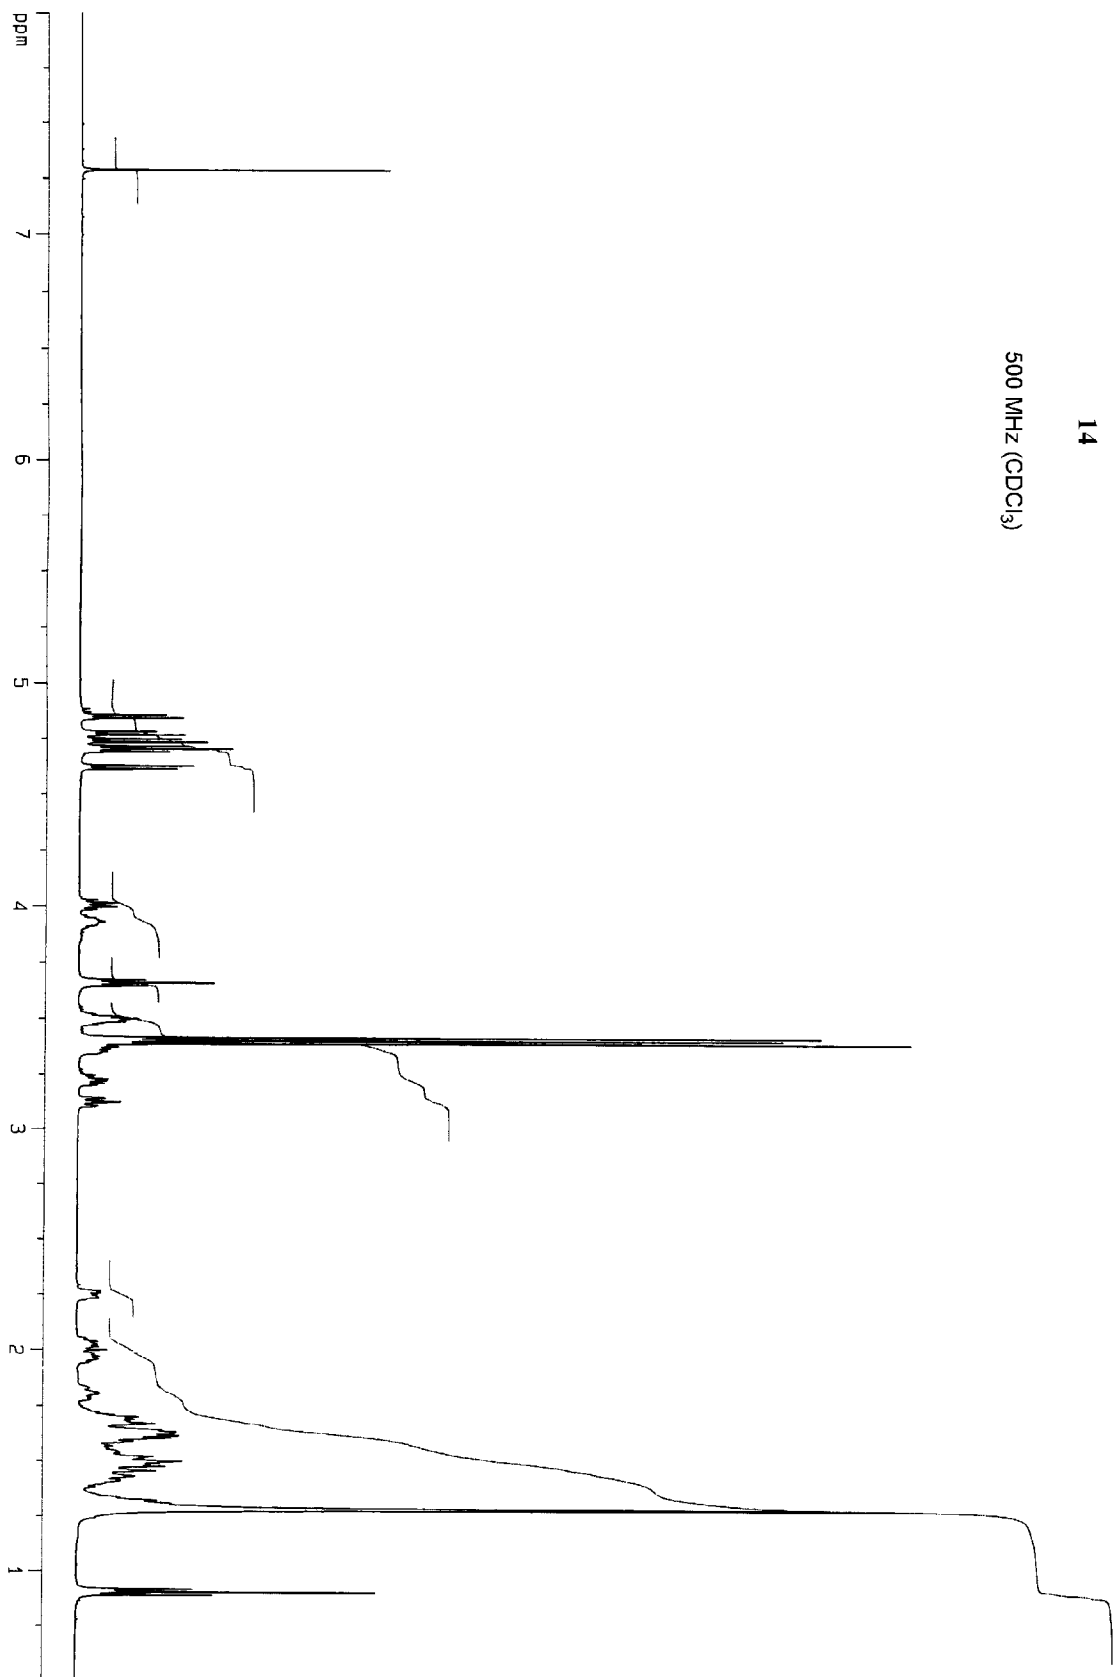

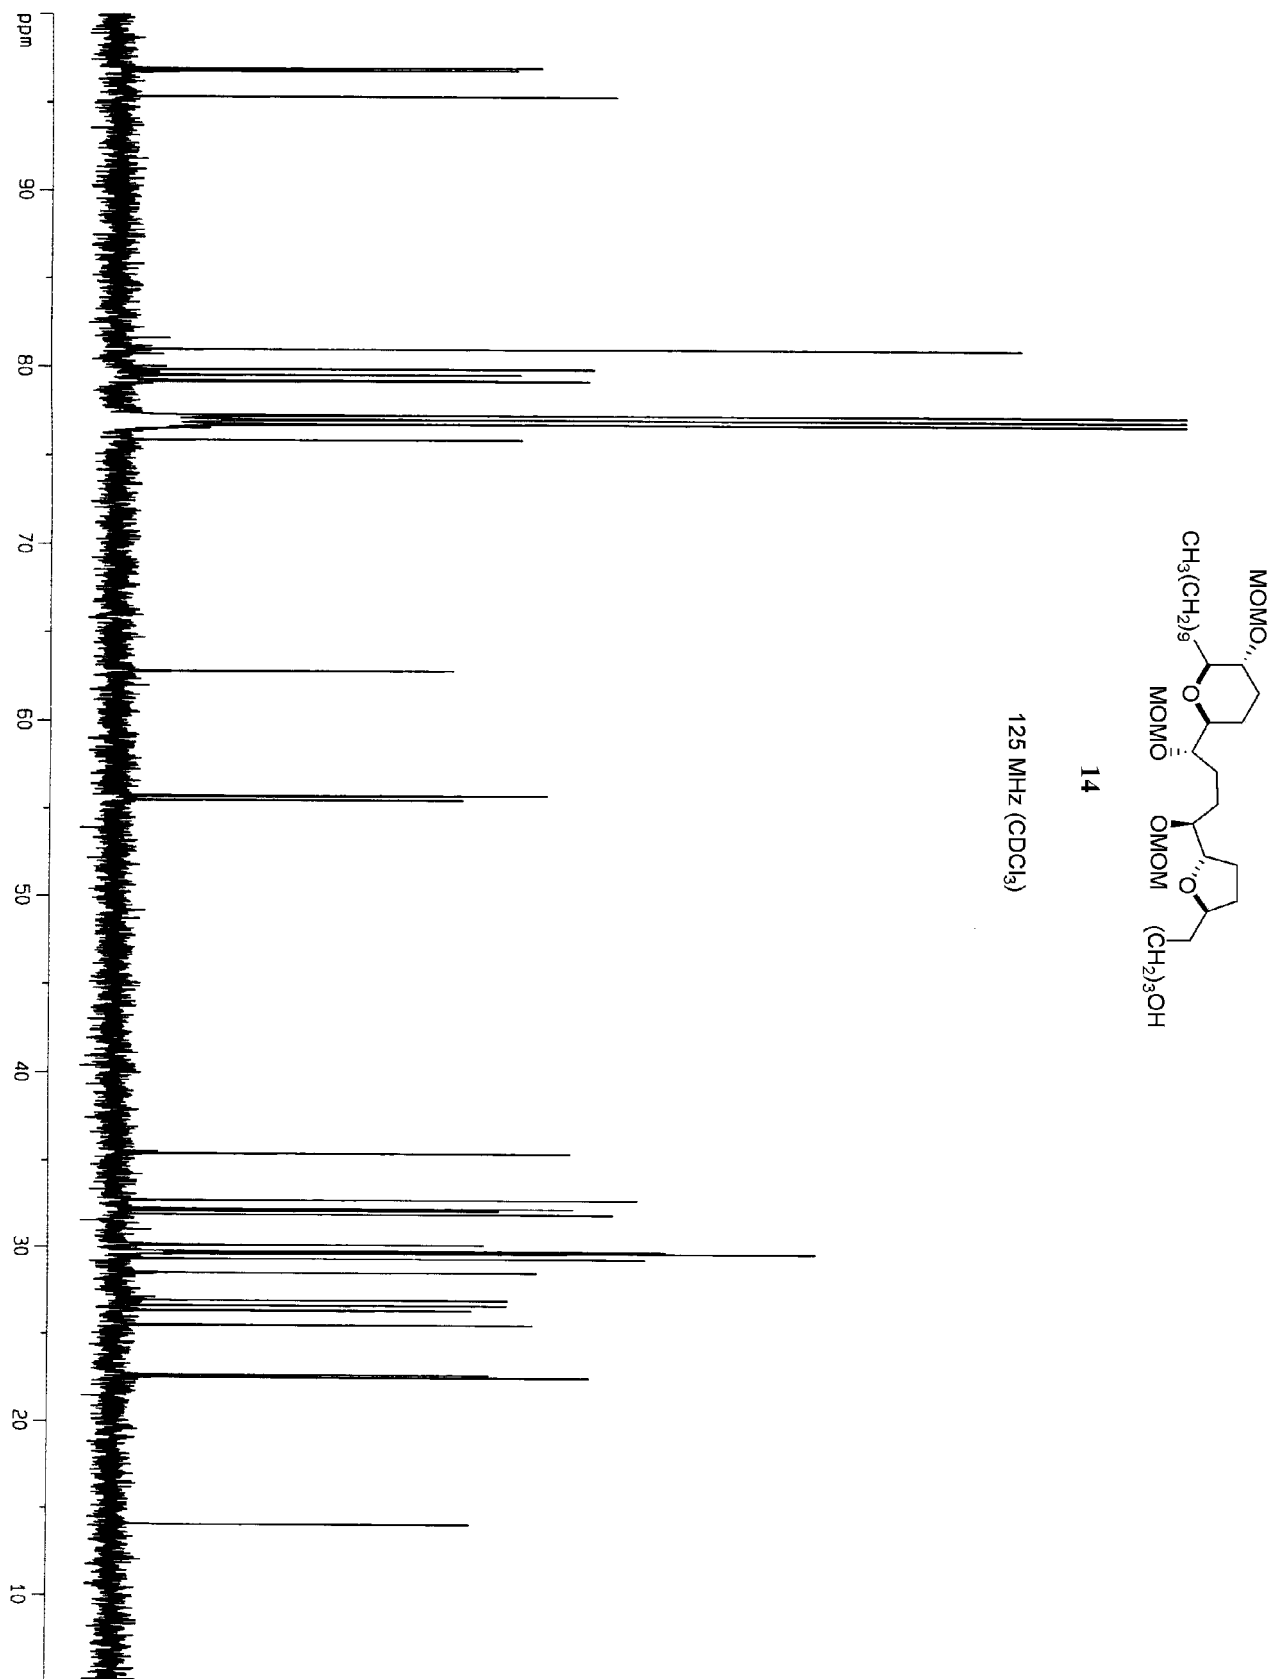

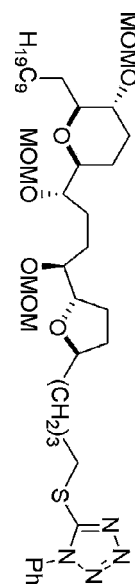

15

500 MHz (CDCl<sub>3</sub>)

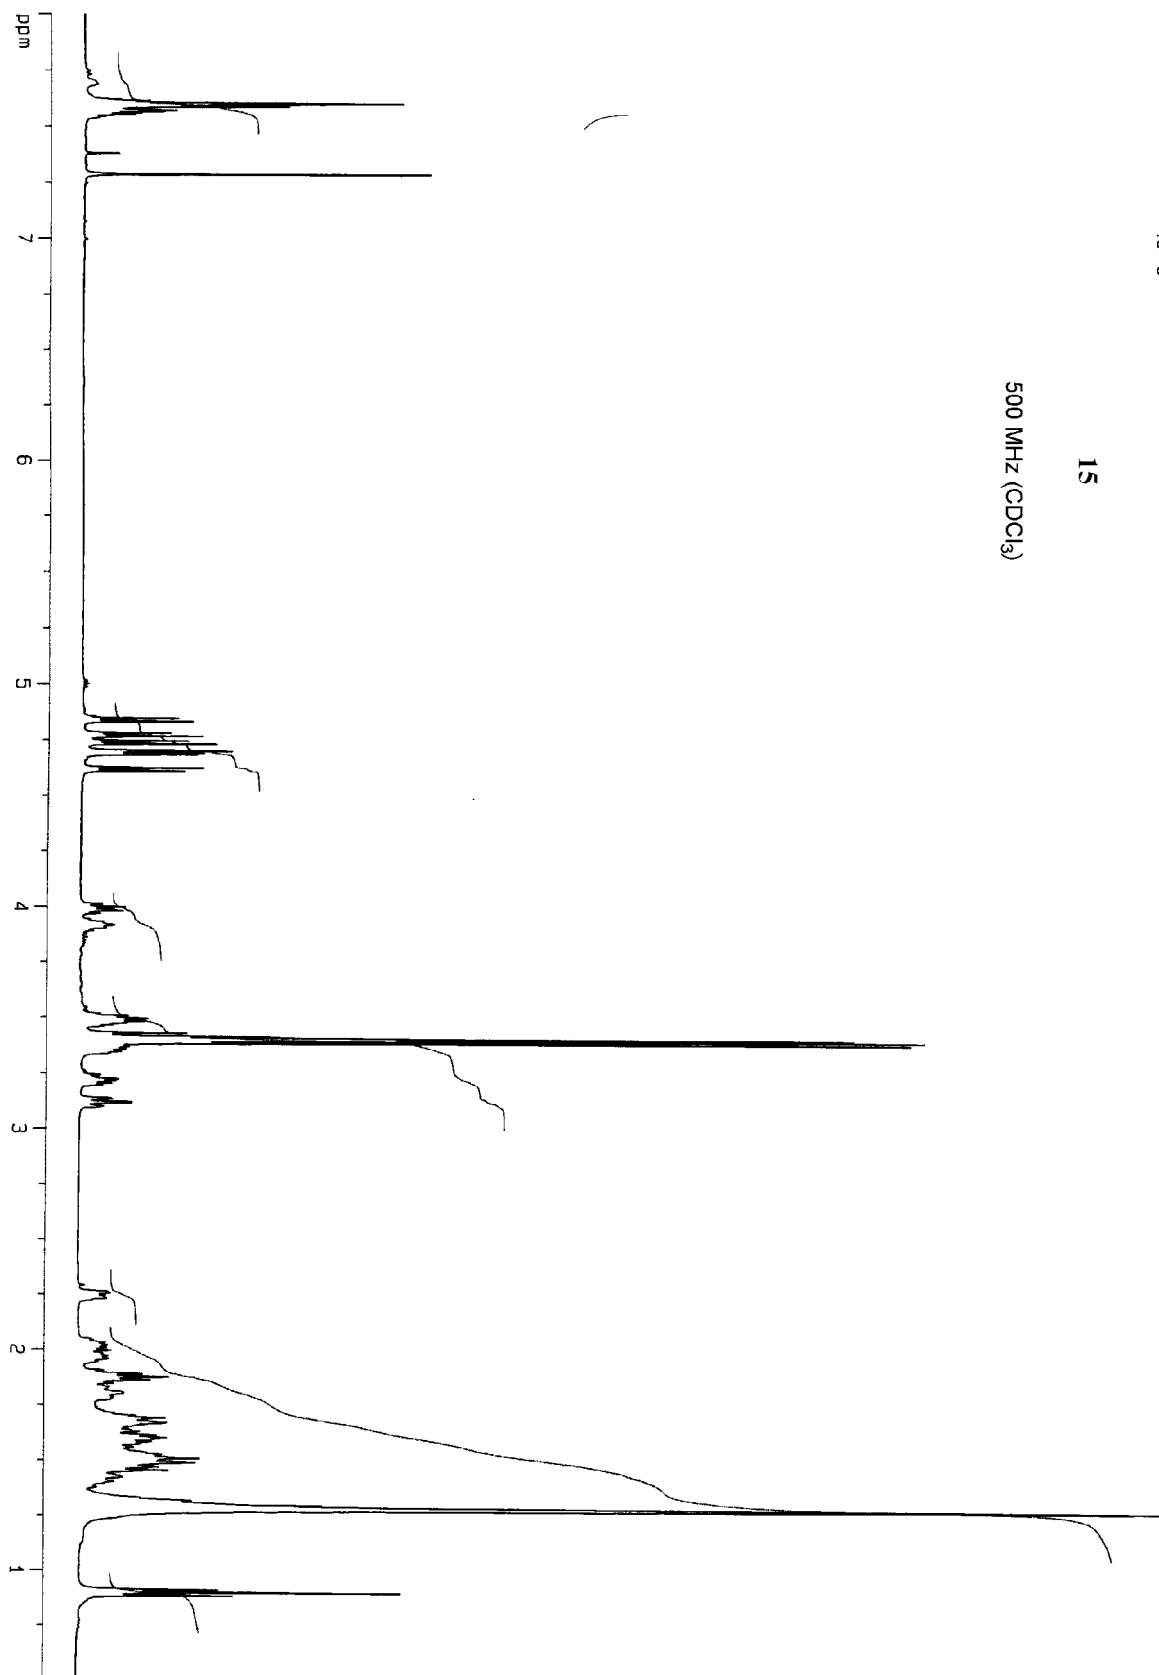

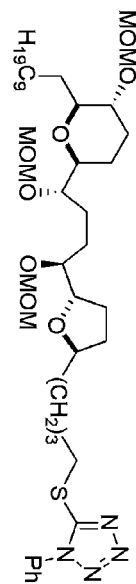

15

125 MHz (CDCl<sub>3</sub>)

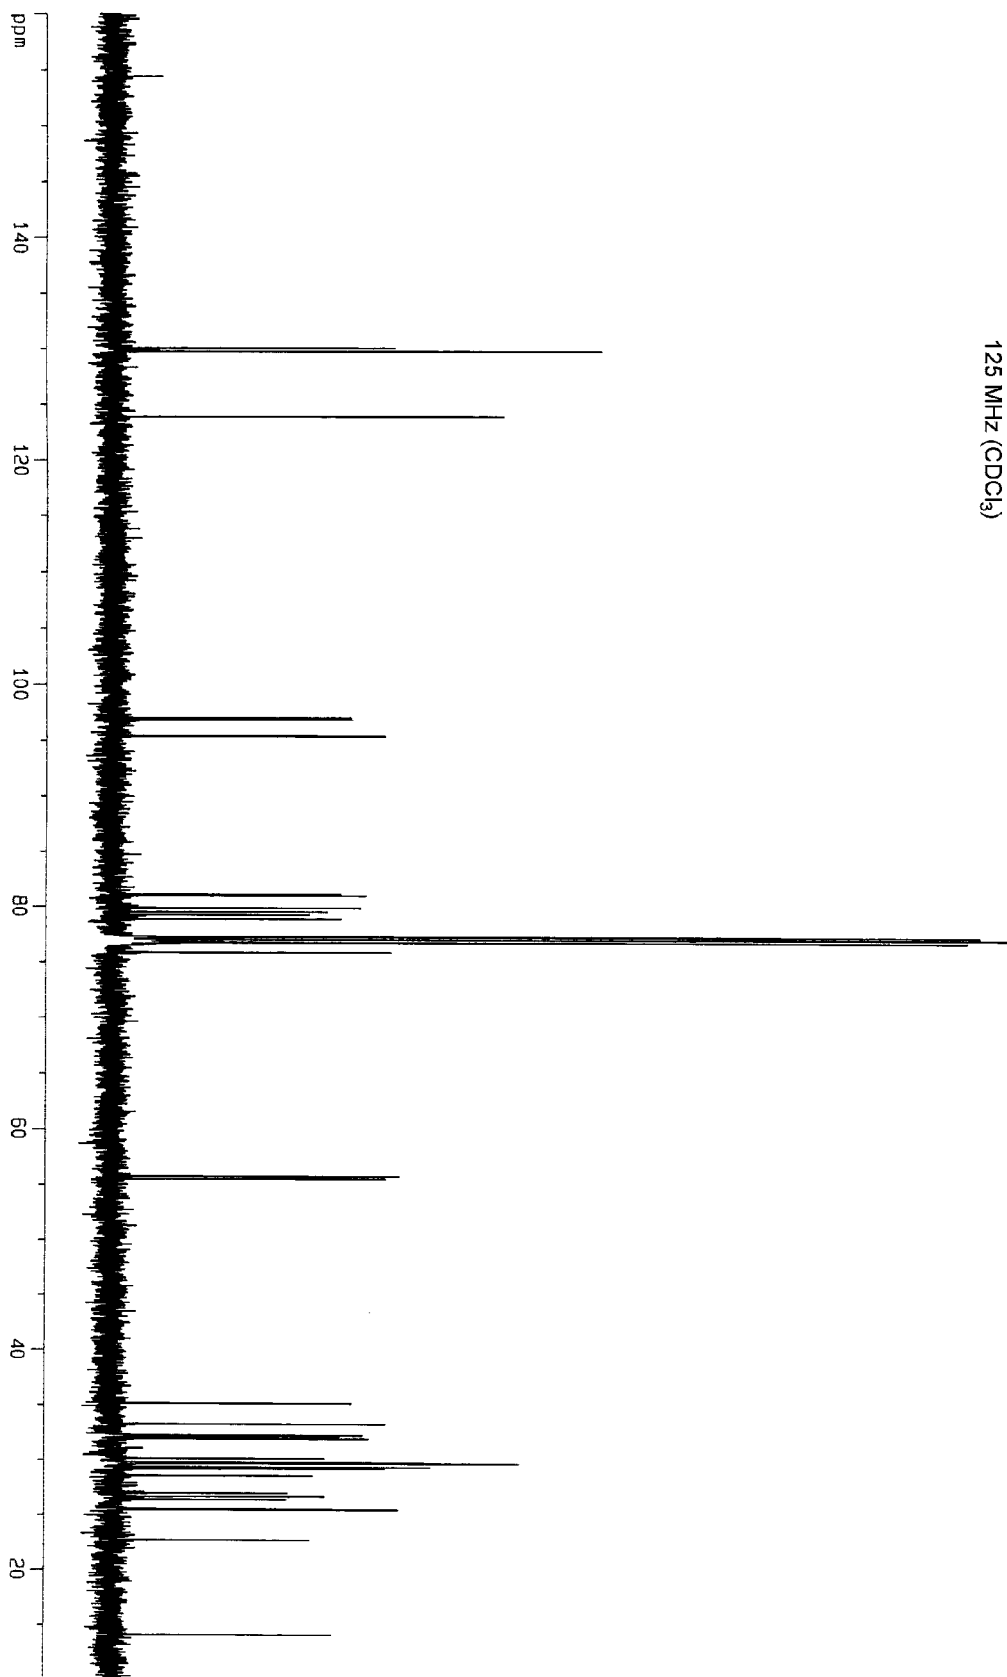

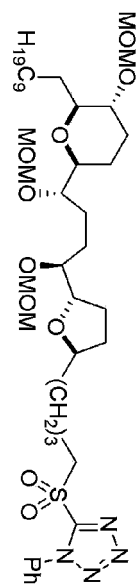

16

500 MHz (CDCl<sub>3</sub>)

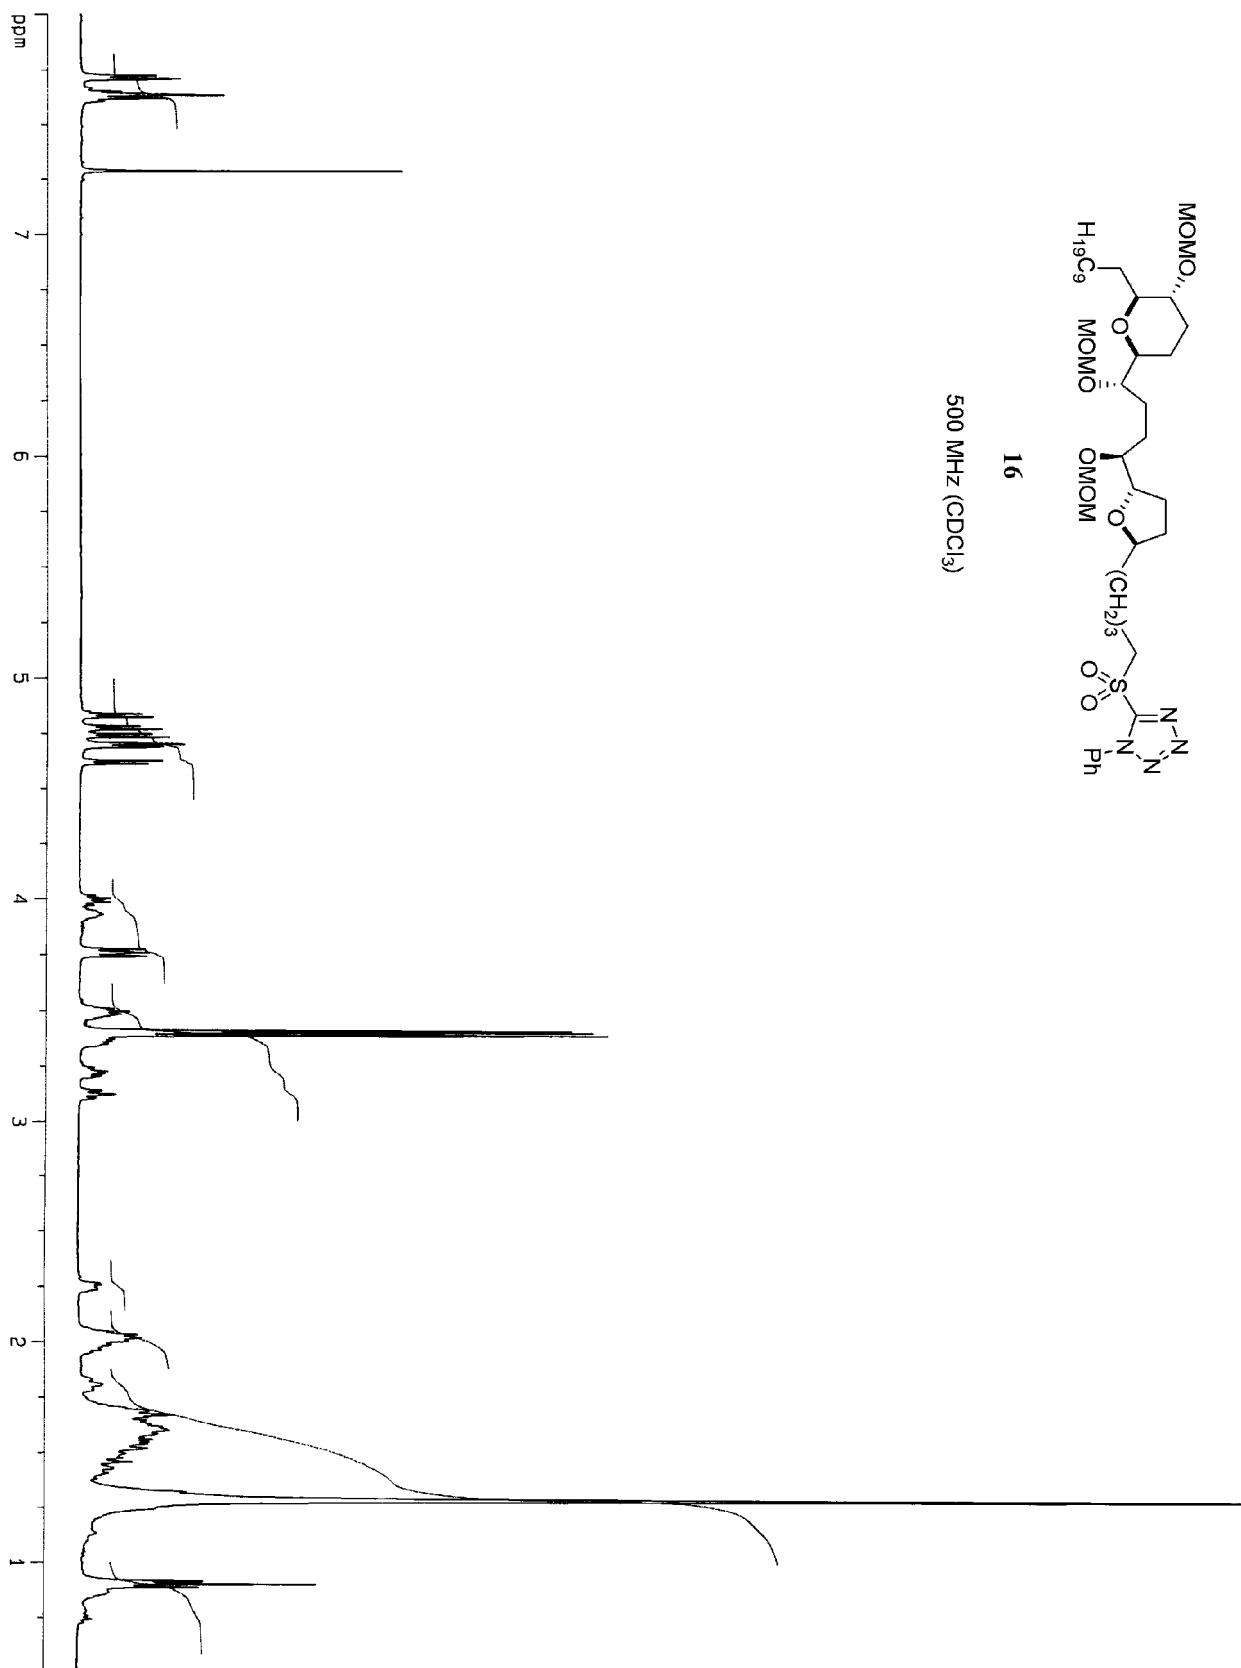



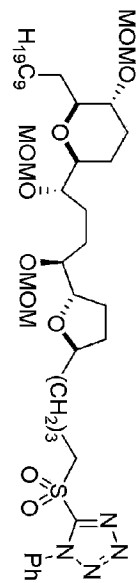

16

125 MHz (CDCl<sub>3</sub>)

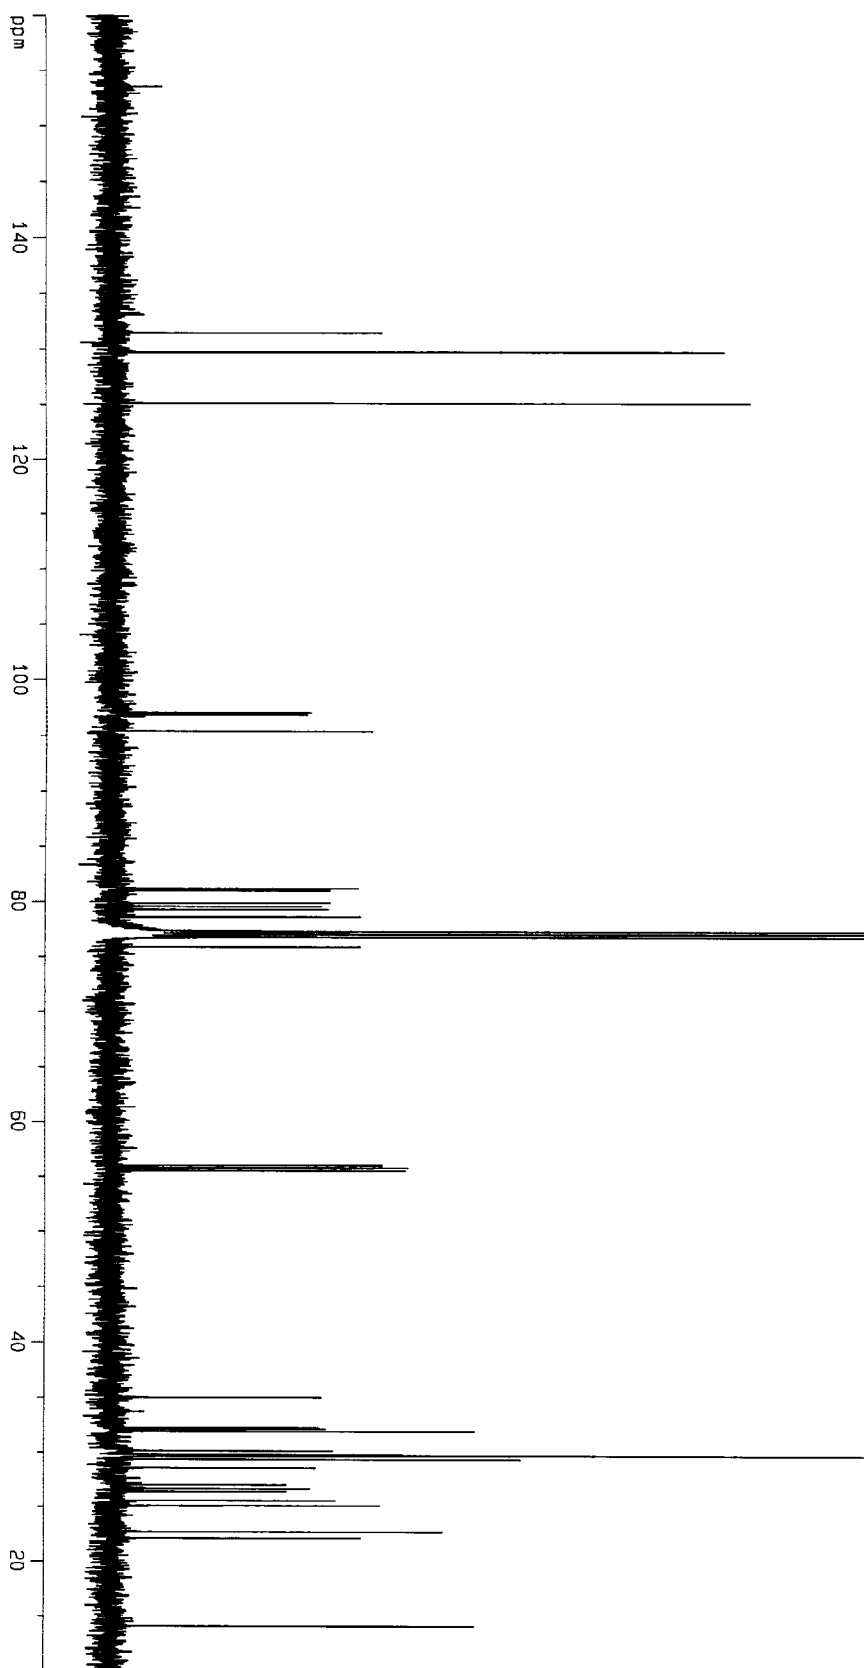

Supplement: b504937g(2).pdf [file b504937g%282%29.pdf]
